# Supplementary material
Source: publisher site journal article supplement (https://www.dovepress.com/get_supplementary_file.php?f=403570.docx)
Supplement: Supplementary file 1 [file get_supplementary_file.php]

**Supplementary Material**

| **Table S1: Social Support Measures at Year 3, Overall and by Demographic Characteristics (N=136)** | | | | | | | | | | |
| --- | --- | --- | --- | --- | --- | --- | --- | --- | --- | --- |
|  |  | **Age at Year 3 (years)** | | | **Sexa** | | **Race** | | **Ethnicity** | |
| **Social Support Measure** | **Total (n=136)** | **18 - 20 (n=1)** | **21 - 24 (n=110)** | **≥ 25 (n=25)** | **Male (n=51)** | **Female (n=85)** | **Black (n=99)** | **White/**  **Other (n=26)** | **Hispanic (n=34)** | **Not Hispanic (n=101)** |
| ***Emotional*** | | | | | | | | | | |
| Mean T-score (s.d.) | 43.8 (12.4) | 42 (.) | 43.6 (12.4) | 44.8 (12.6) | 46.1 (11.5) | 42.5 (12.7) | 43.9 (12.6) | 41.6 (11.4) | 44.6 (11.5) | 43.6 (12.8) |
| minimum, maximum | 13, 62 | 42, 42 | 13, 62 | 25, 62 | 25, 62 | 13, 62 | 13, 62 | 13, 62 | 25, 62 | 13, 62 |
| Low [T-score ≤40; n (%)] | 56 (41%) | 0 (0%) | 45 (41%) | 11 (44%) | 16 (31%) | 40 (47%) | 41 (41%) | 12 (46%) | 14 (41%) | 42 (42%) |
| Average [T-score >40-59; n (%)] | 53 (39%) | 1 (100%) | 45 (41%) | 7 (28%) | 23 (45%) | 30 (35%) | 37 (37%) | 12 (46%) | 14 (41%) | 38 (38%) |
| High [T-score ≥60; n (%)] | 27 (20%) | 0 (0%) | 20 (18%) | 7 (28%) | 12 (24%) | 15 (18%) | 21 (21%) | 2 (8%) | 6 (18%) | 21 (21%) |
| ***Instrumental*** | | | | | | | | | | |
| Mean T-score (s.d.) | 43.1 (10.5) | 51 (.) | 43.3 (10.3) | 41.8 (11.1) | 45.3 (9.9) | 41.8 (10.6) | 43.3 (10.8) | 40.4 (7.5) | 43.7 (9.5) | 42.9 (10.8) |
| minimum, maximum | 21, 63 | 51, 51 | 21, 63 | 24, 63 | 24, 63 | 21, 63 | 21, 63 | 21, 54 | 27, 63 | 21, 63 |
| Low [T-score ≤40; n (%)] | 67 (49%) | 0 (0%) | 52 (47%) | 15 (60%) | 20 (39%) | 47 (55%) | 51 (52%) | 13 (50%) | 14 (41%) | 53 (52%) |
| Average [T-score >40-59; n (%)] | 53 (39%) | 1 (100%) | 45 (41%) | 7 (28%) | 24 (47%) | 29 (34%) | 35 (35%) | 13 (50%) | 16 (47%) | 36 (36%) |
| High [T-score ≥60; n (%)] | 16 (12%) | 0 (0%) | 13 (12%) | 3 (12%) | 7 (14%) | 9 (11%) | 13 (13%) | 0 (0%) | 4 (12%) | 12 (12%) |
| ***Friendship*** | | | | | | | | | | |
| Mean T-score (s.d.) | 43.9 (11.8) | 56 (.) | 43.6 (11.9) | 44.4 (11.4) | 47.7 (11.4) | 41.6 (11.5) | 44.5 (12.1) | 40.4 (10.8) | 44.3 (9.9) | 43.8 (12.5) |
| minimum, maximum | 16, 67 | 56, 56 | 16, 67 | 24, 61 | 16, 67 | 16, 67 | 16, 67 | 16, 67 | 29, 67 | 16, 67 |
| Low [T-score ≤40; n (%)] | 55 (40%) | 0 (0%) | 45 (41%) | 10 (40%) | 14 (27%) | 41 (48%) | 37 (37%) | 14 (54%) | 15 (44%) | 39 (39%) |
| Average (T-score >40-59; n (%)] | 69 (51%) | 1 (100%) | 55 (50%) | 13 (52%) | 30 (59%) | 39 (46%) | 53 (54%) | 11 (42%) | 16 (47%) | 53 (52%) |
| High (T-score ≥60; n (%)] | 12 (9%) | 0 (0%) | 10 (9%) | 2 (8%) | 7 (14%) | 5 (6%) | 9 (9%) | 1 (4%) | 3 (9%) | 9 (9%) |

Notes: Missing observations: race (n=11), ethnicity (n=1).

*a* Women constitute a larger proportion of AMP Up enrollees than men due to the co-enrollment of mothers with PHIV from the PHACS SMARTT (Surveillance Monitoring for ART Toxicities) study.

**Figure S1: Effect modification by transition status on adjusted association of social support with viral suppression, among participants 18-27 years old at entry**
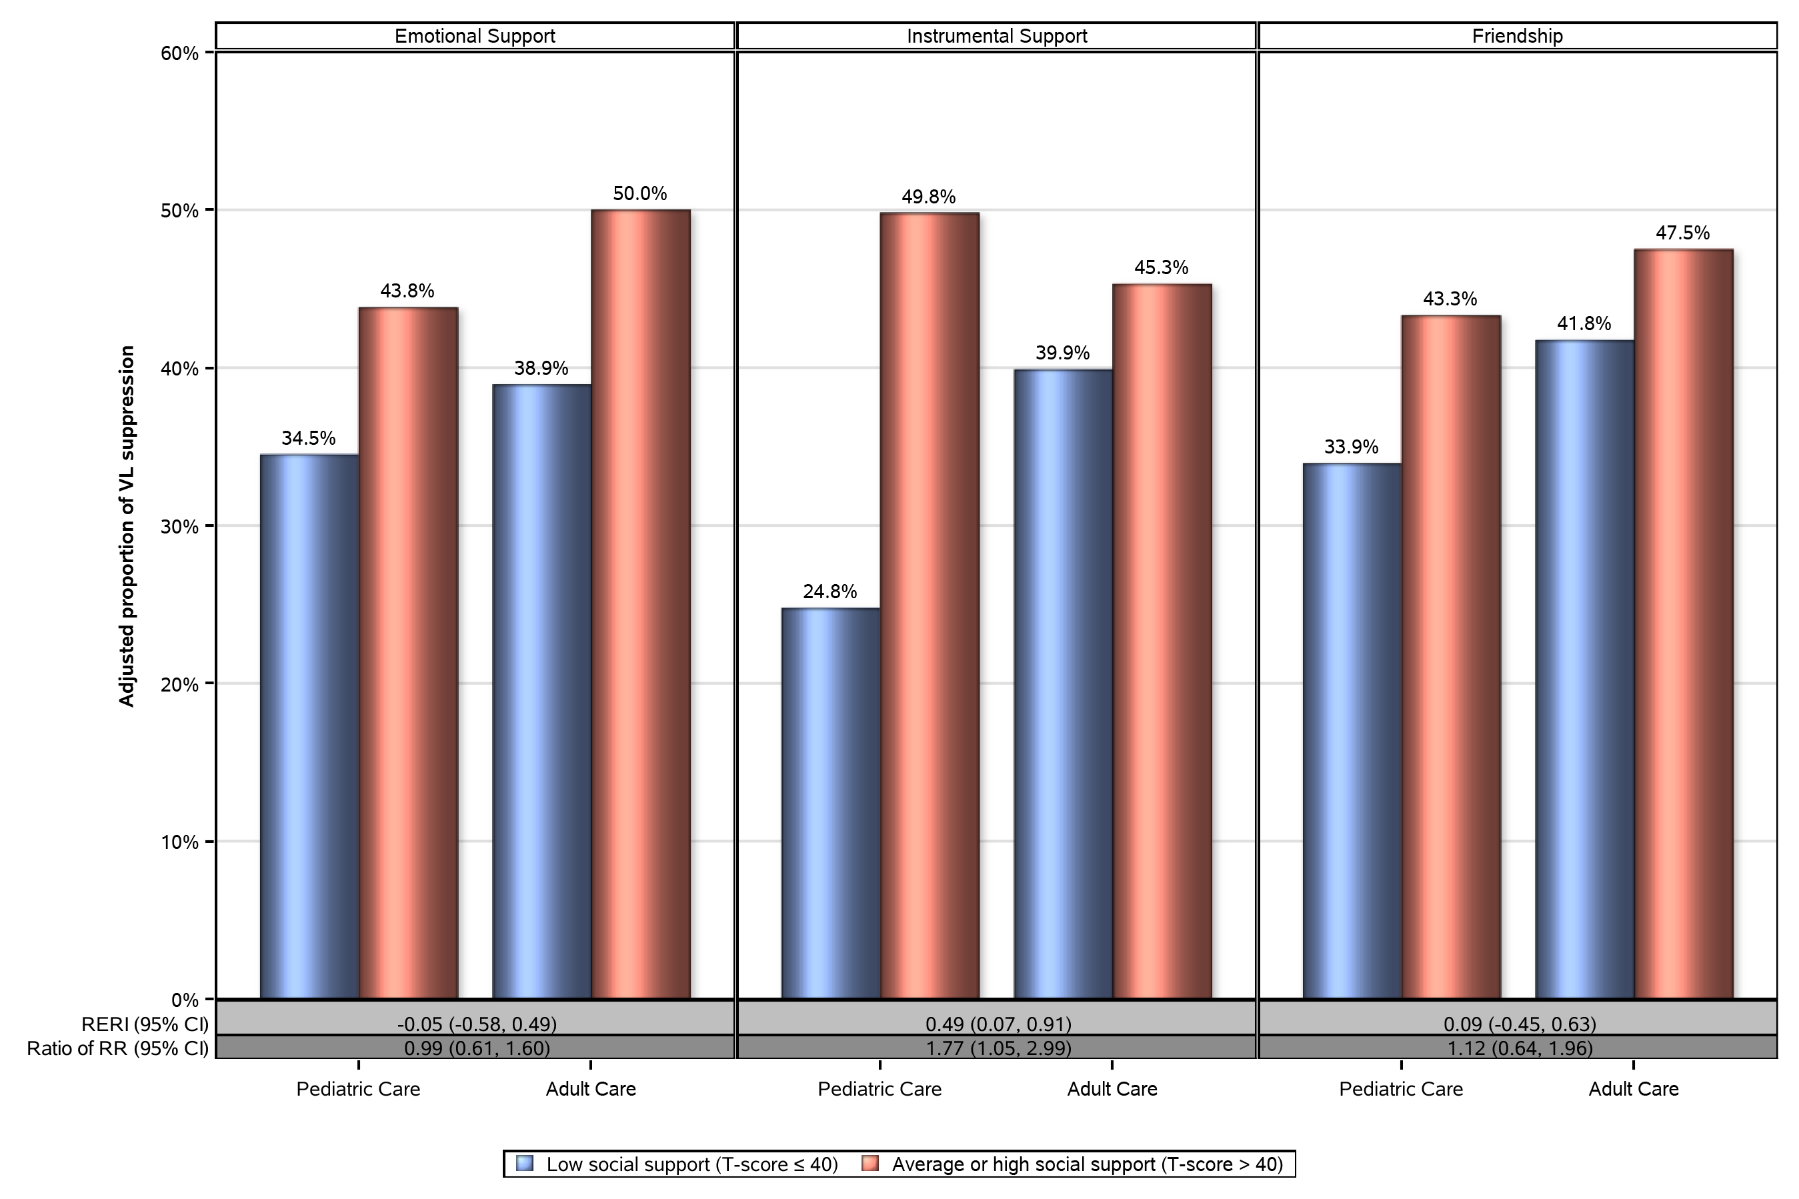


Y-axis represents adjusted proportion of viral suppression for each combination of social support and transition status strata.

RR: Adjusted risk ratio of viral suppression comparing participants within each combined stratum of social support and transition status to the reference stratum (=low support + adult care).

RERI (additive interaction) = (combined effect of transition status and social support) - (individual effect of transition status) - (individual effect of social support) + 1.

Ratio of RR (multiplicative interaction) = (combined effect of transition status and social support) / (individual effect of transition status) * (individual effect of social support).

Viral load measures assessed in one-year period (3-15 months) following social support assessments at entry or year 3. Viral suppression defined as all viral load measures over one-year <50 copies/mL.

GEE Poisson regression models with exchangeable correlation structure were used to take into account repeat social support and viral load measures at entry and year 3.

Separate models were fit for each social support measure, adjusting for age and medical insurance at entry and year 3, sex, race, and ethnicity.
